# Supplementary material for: Population Genetics Assessment of the Model Coral Species Stylophora pistillata from Eilat, the Red Sea
Source: MDPI journal article supplement (doi:10.3390/jmse12020315), 2024-02-12
Supplement: s1 [file s1]

Archive with 1 entries (1 files):
- jmse-2844590 - Supplementary Figures.pdf
